# Supplementary material
Source: PubMed Central journal article supplement (PMC10530462)

# Supplementary Fig. S1

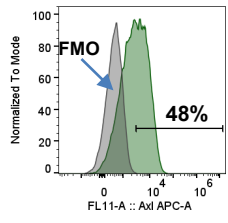

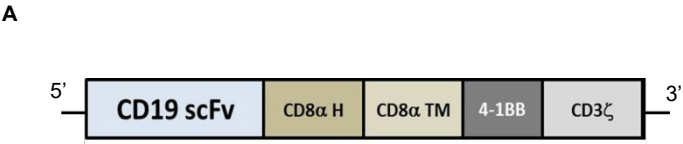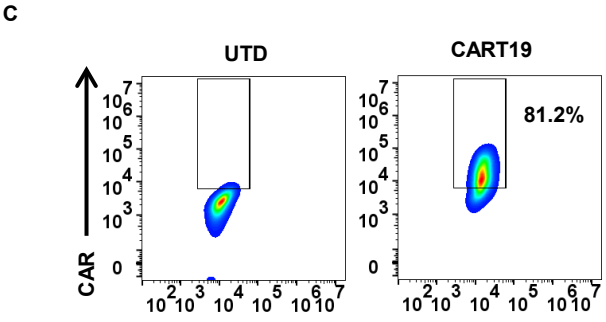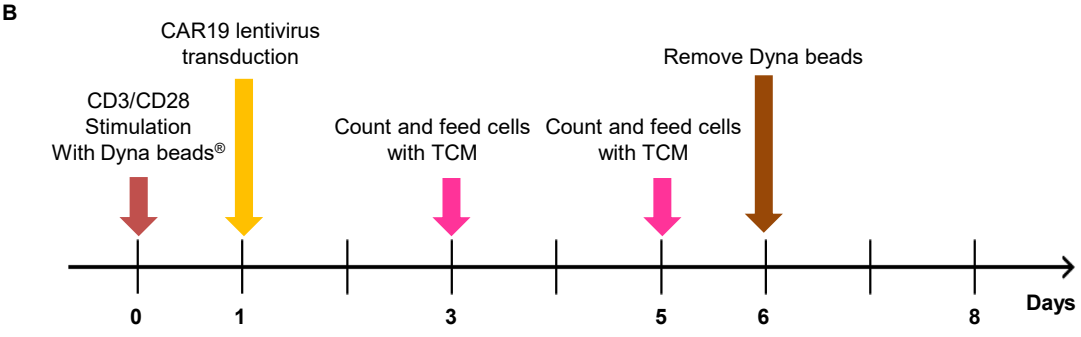

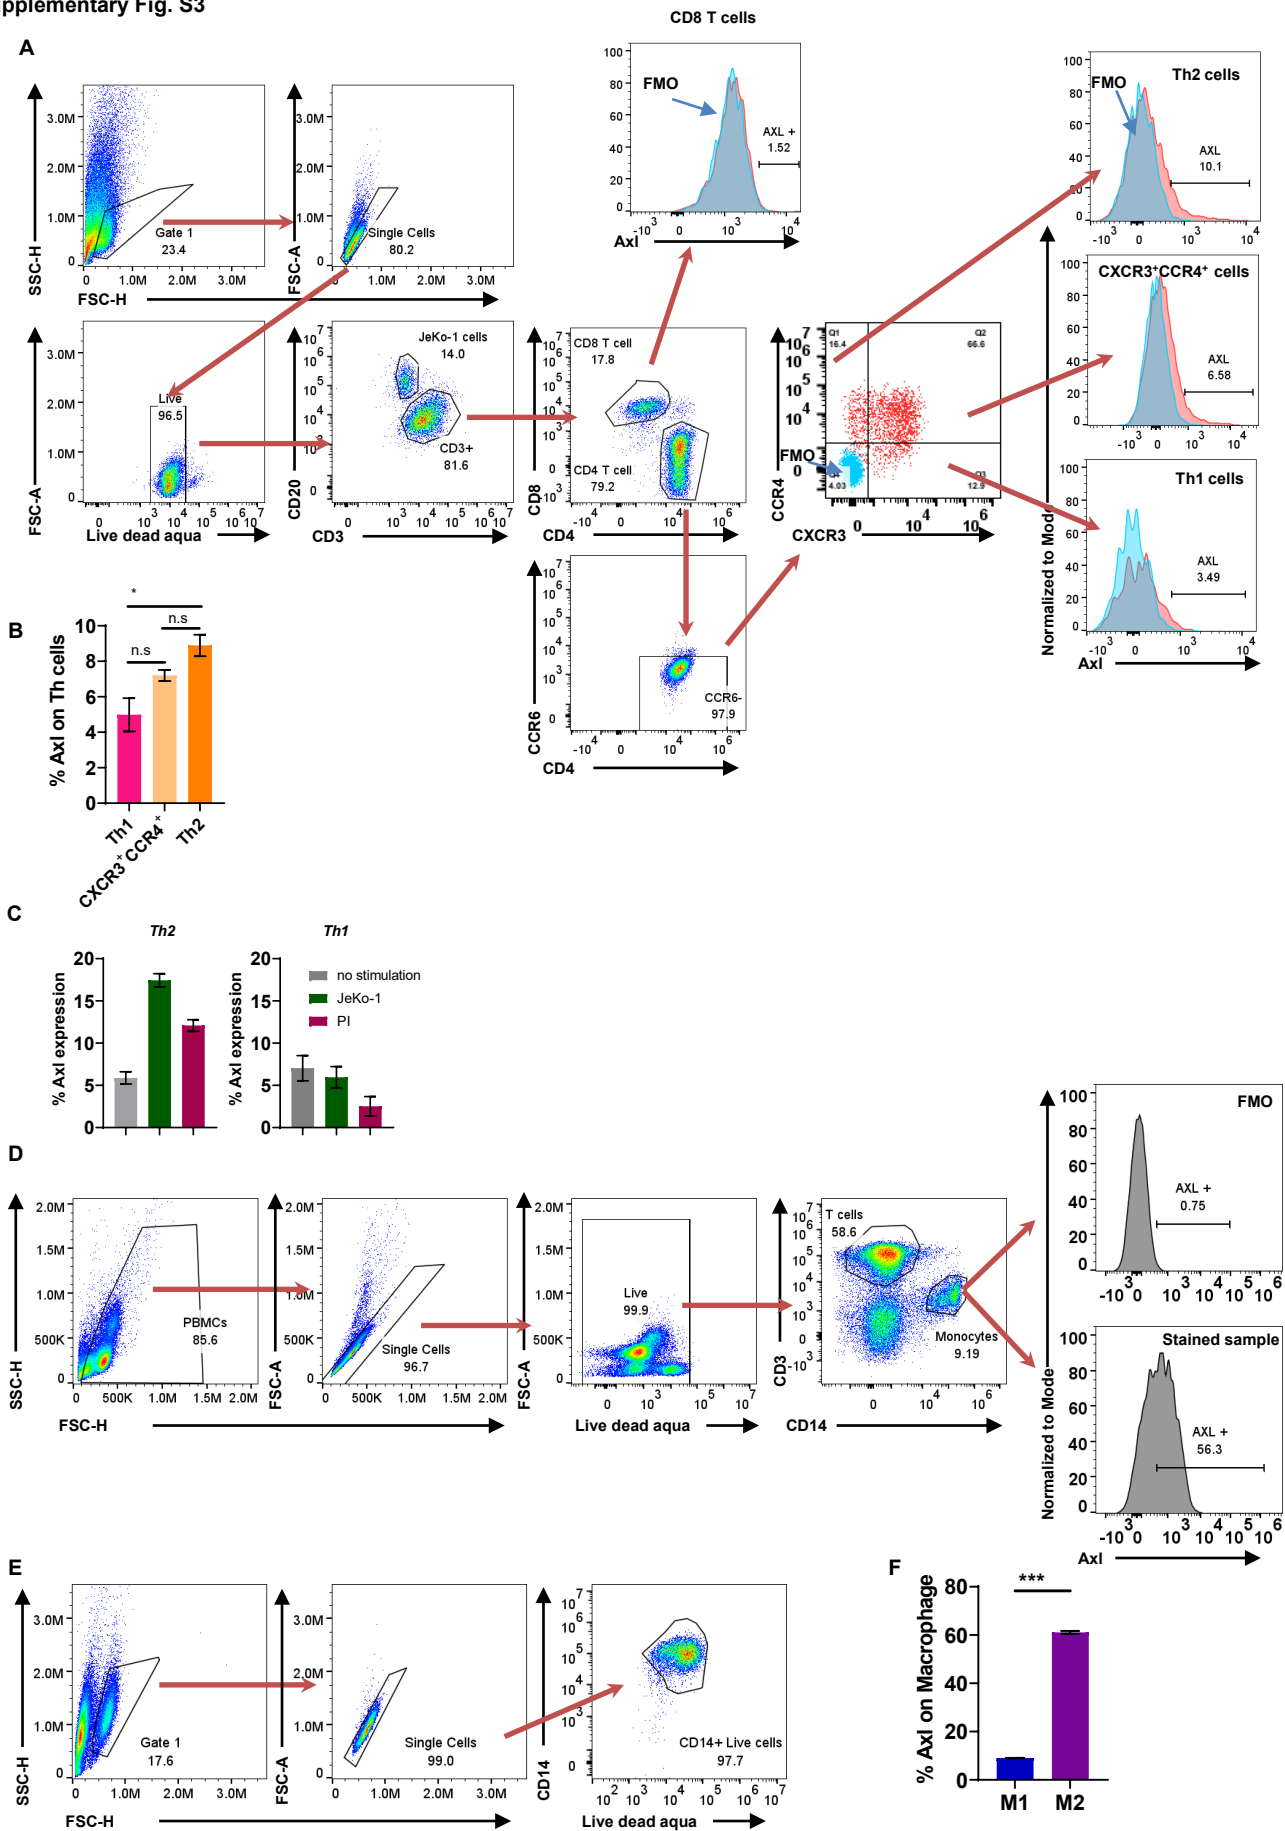

**A** *JeKo-1*

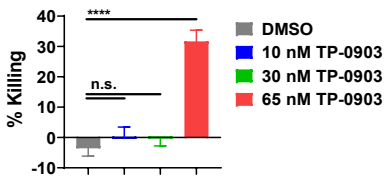

**B** *JeKo-1*

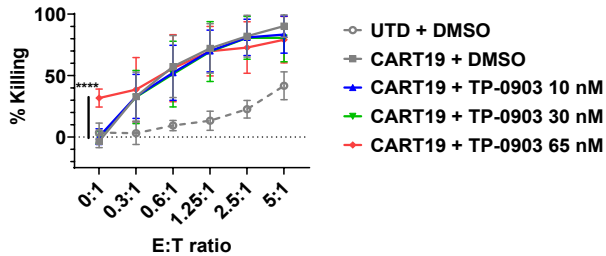

**C**

*Leukemic B cells from CLL patients*

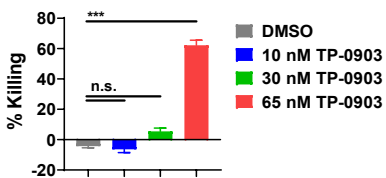

**D**

*Leukemic B cells from CLL patients*

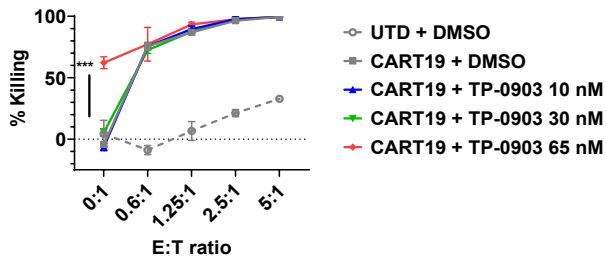

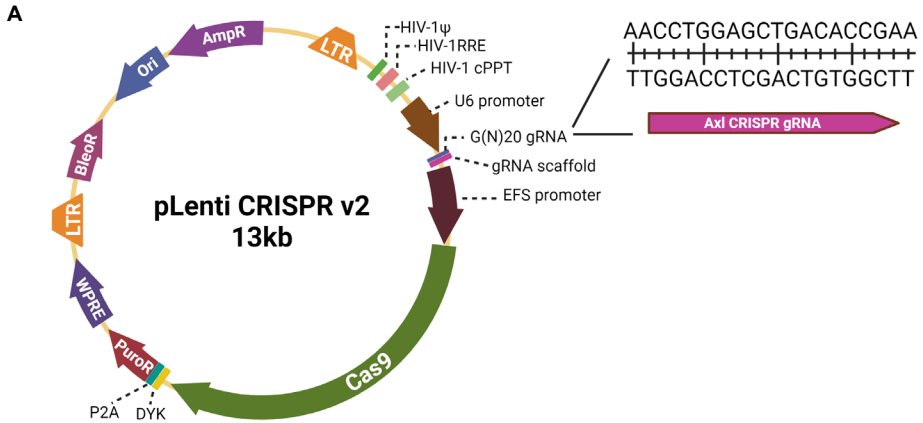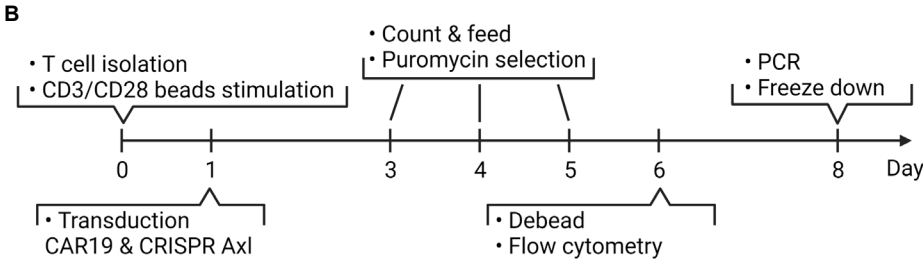

Supplementary Fig. S6

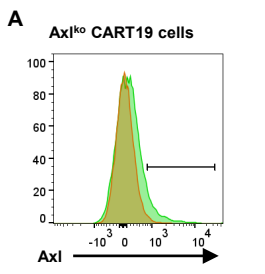

| Sample Name                 | Subset Name | Count |
|-----------------------------|-------------|-------|
| Axl <sup>ko</sup> CART cell | CD4 T cell  | 11261 |
| Axl <sup>WT</sup> CART cell | CD4 T cell  | 11725 |

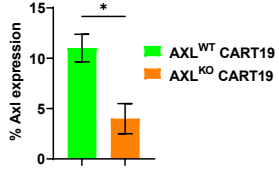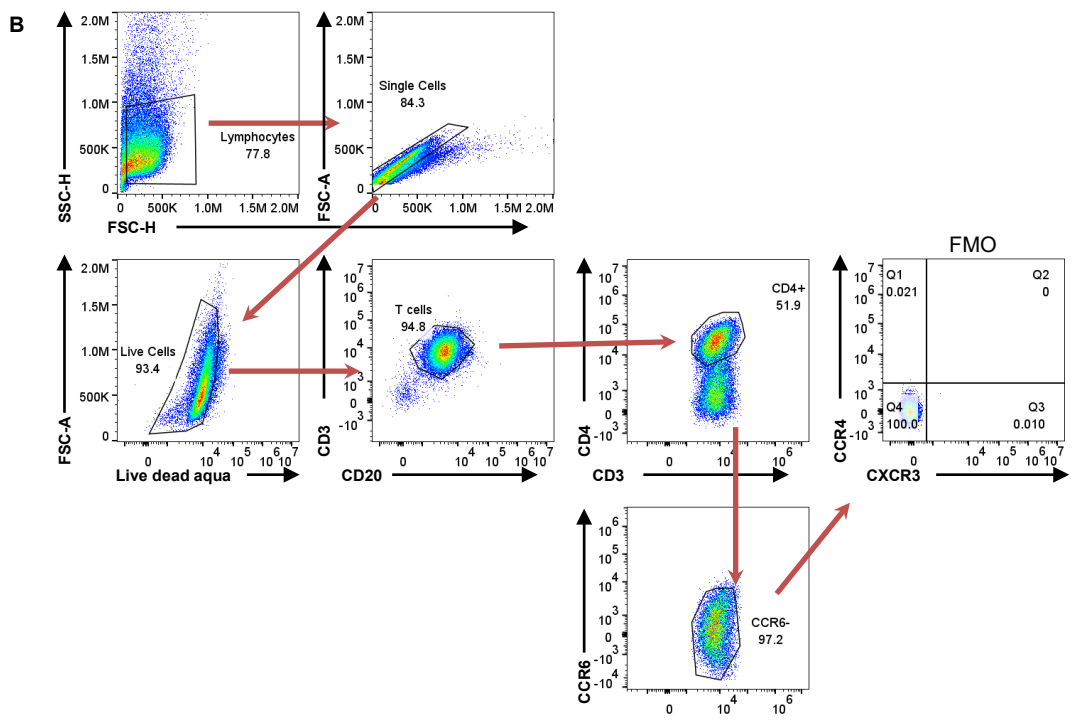

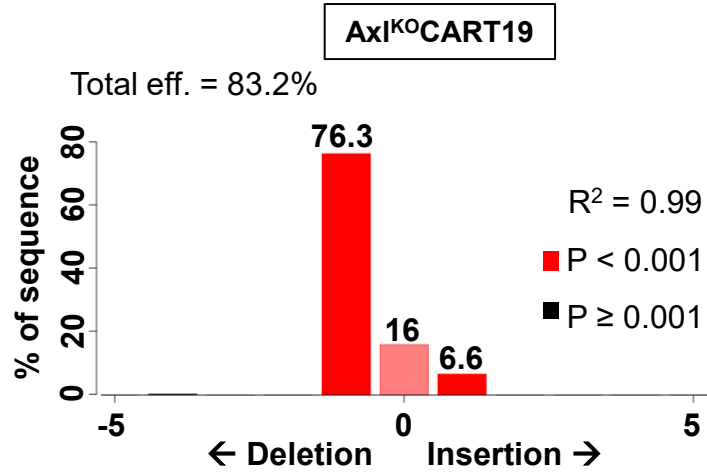

A

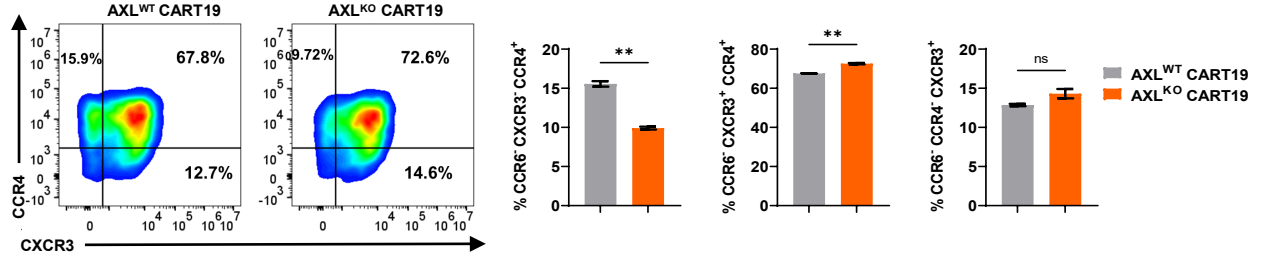

B

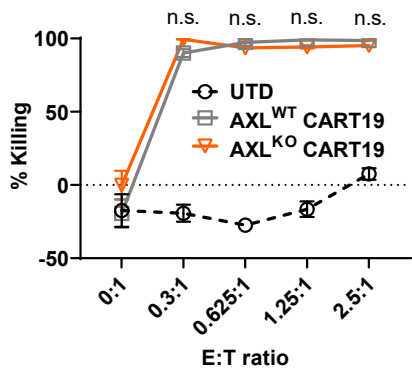

C

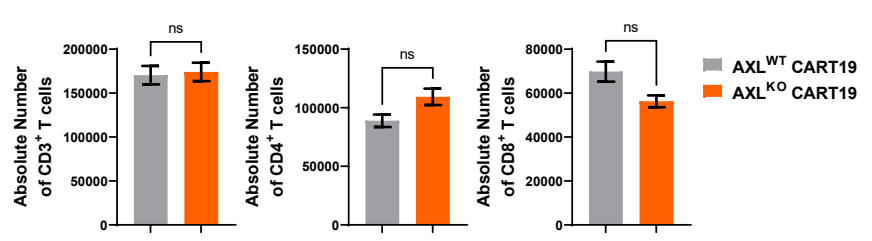



Supplementary Fig. S9

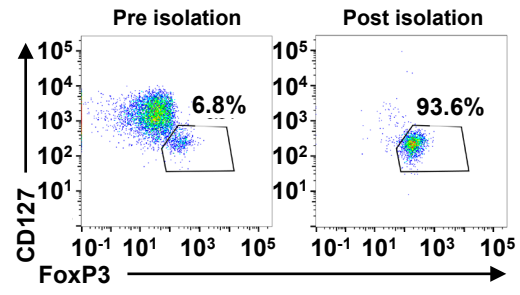

Supplementary Fig. S10

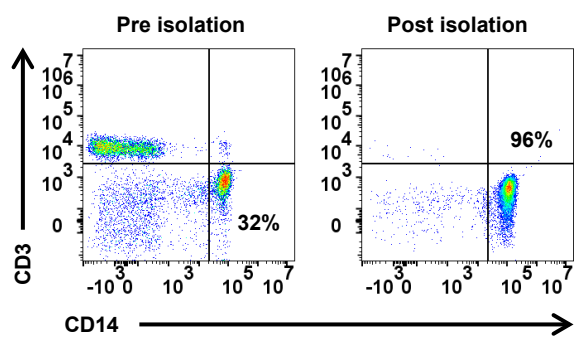

Supplementary Fig. S11

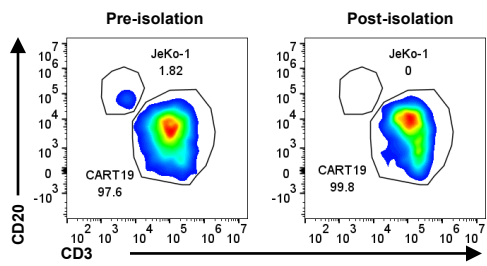

# Supplementary Fig. S12

Macrophage Alternative Activation Signaling Pathway

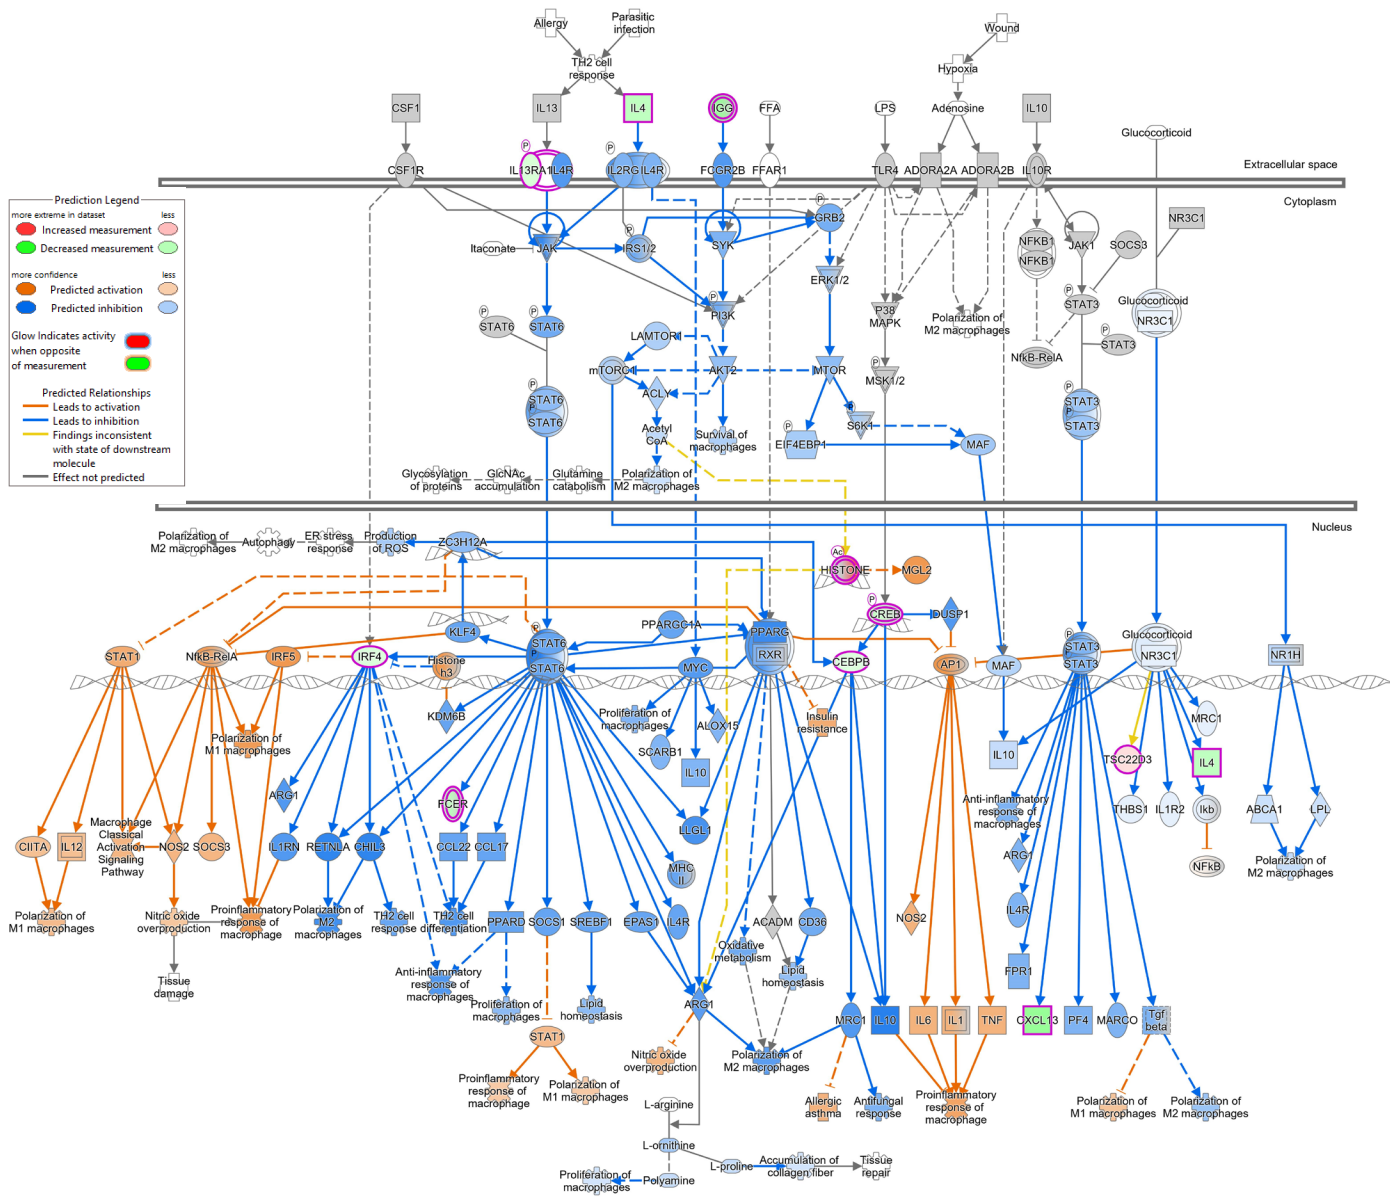

# Supplementary Fig. S13

## IL-33 Signaling Pathway

Infection, allergens, injury, and environmental factors induce IL-33 production and release from cells, that is pro-inflammatory and stimulates Th2 cells particularly.

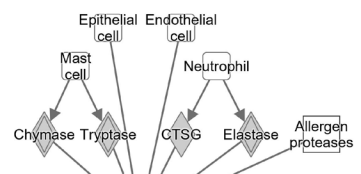

IL33 functions as danger signal or alarmin that is released after cell injury to alert the immune system of tissue damage during trauma or infection

**Prediction Legend**

- more extreme in dataset: red (increased), green (decreased)
- more confidence: blue (activation), orange (inhibition)
- Glow indicates activity when opposite of measurement: red (activation), green (inhibition)
- Predicted Relationships: orange (leads to activation), blue (leads to inhibition), yellow (findings inconsistent), black (effect not predicted)

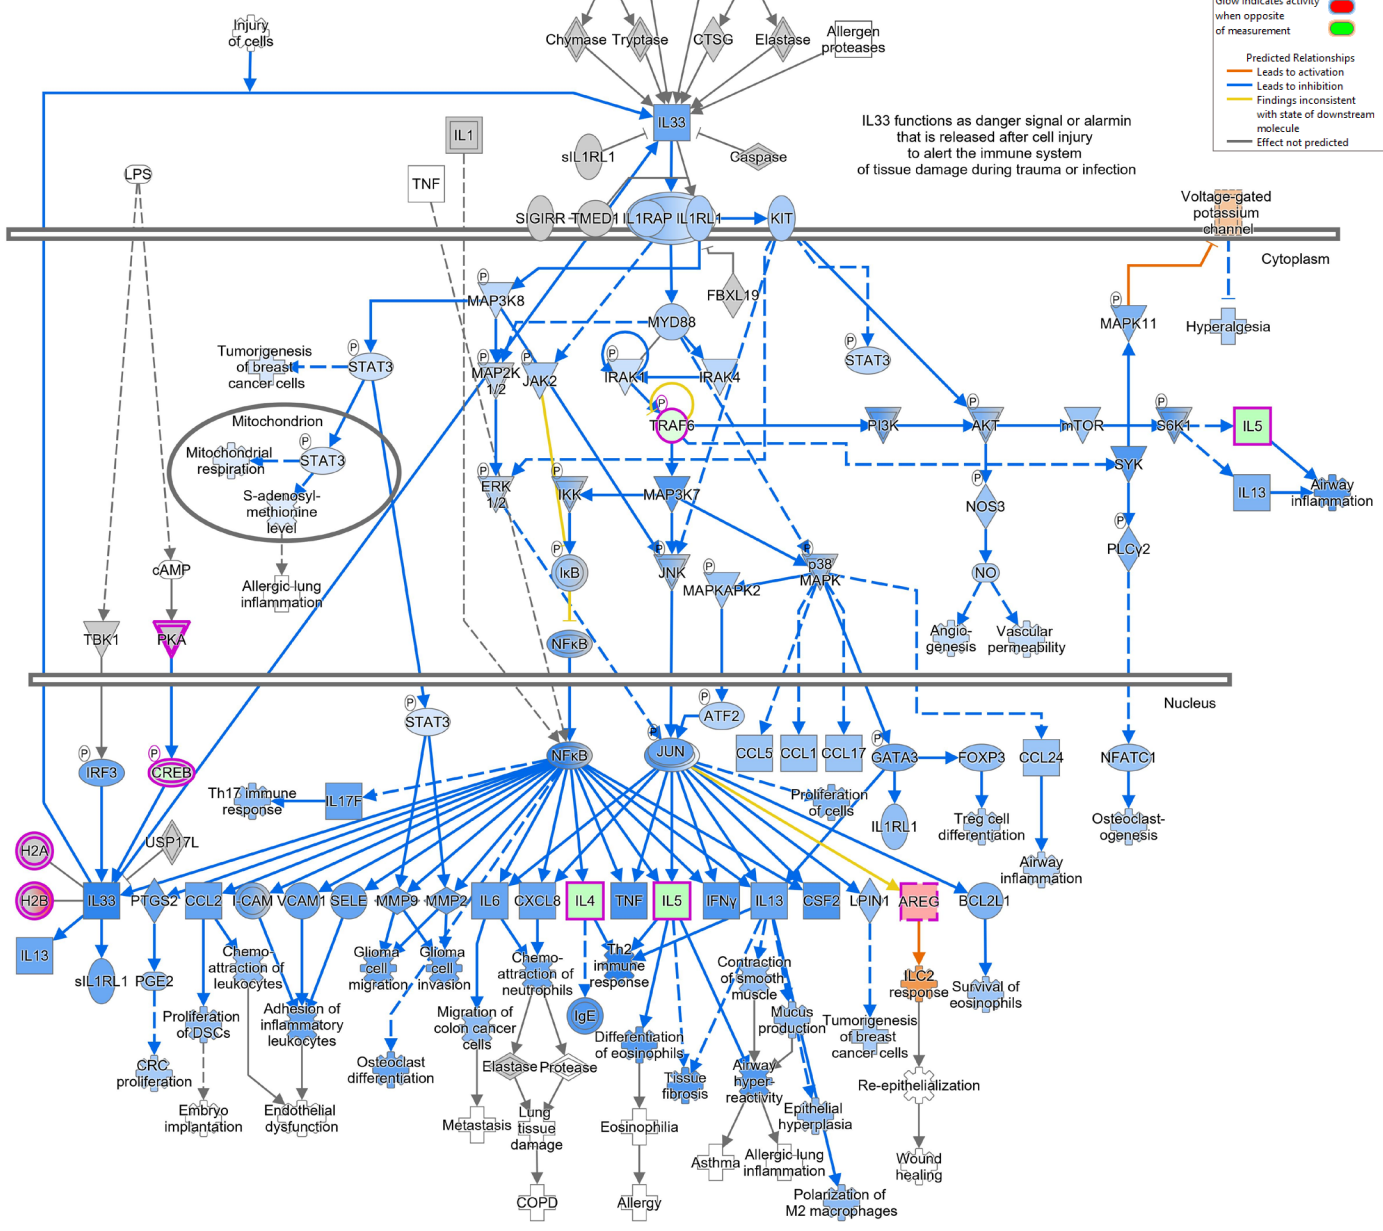

# Supplementary Fig. S14

Role of IL-17F in Allergic Inflammatory Airway Diseases

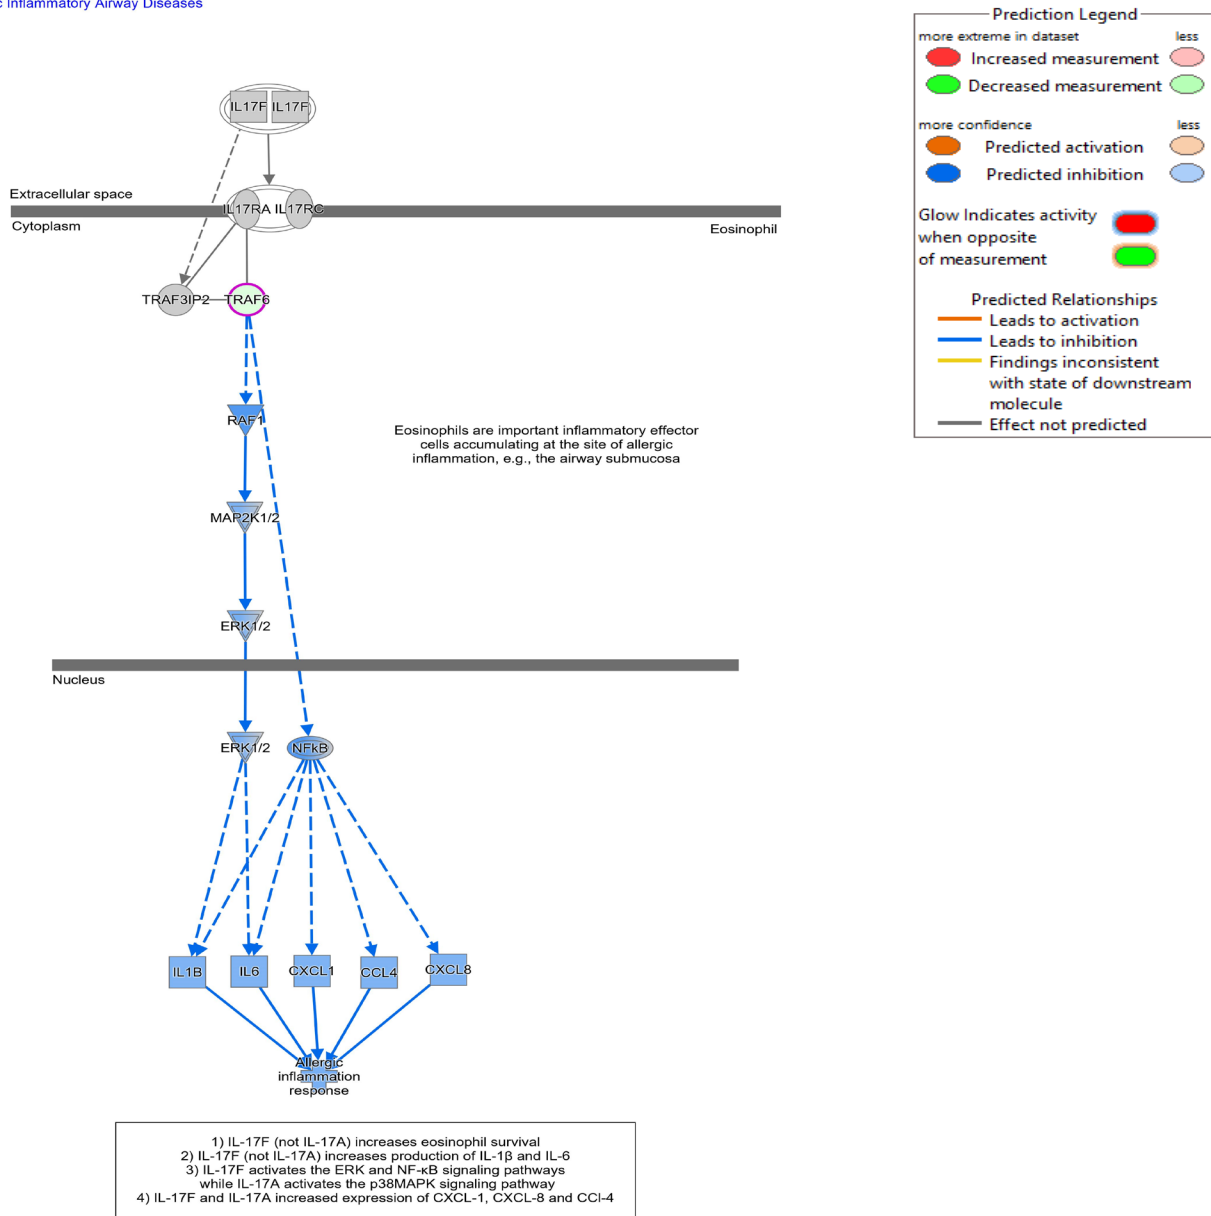



Regulation of IL-2 Expression in Activated and Anergic T Lymphocytes

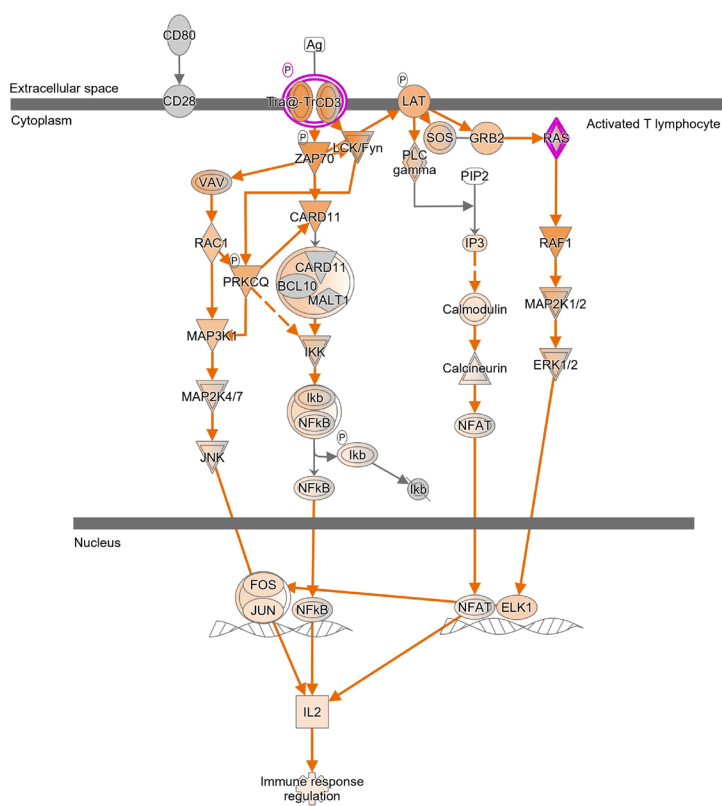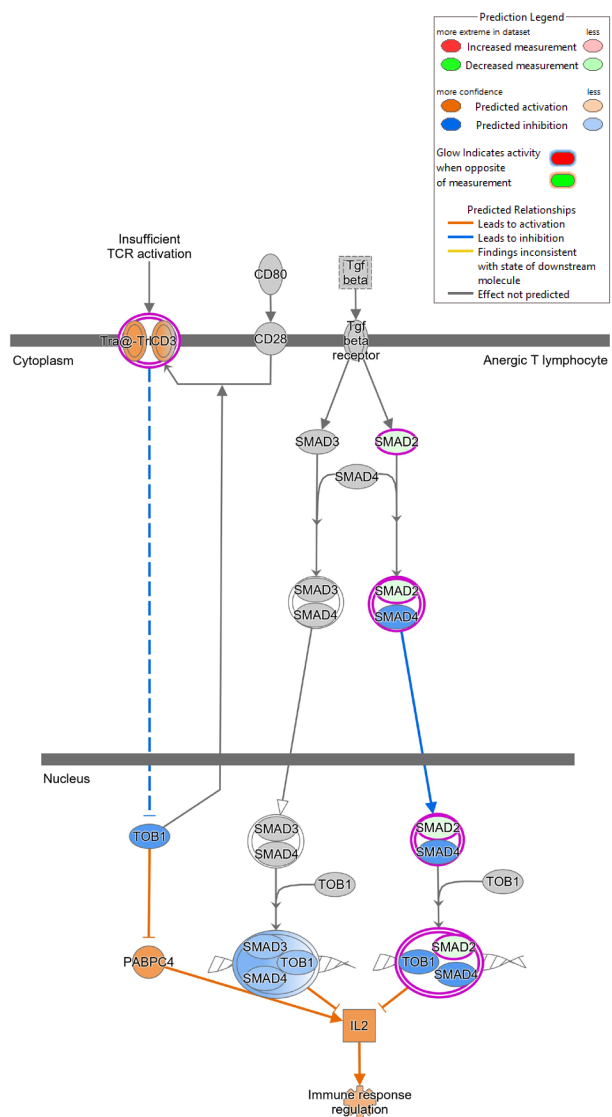



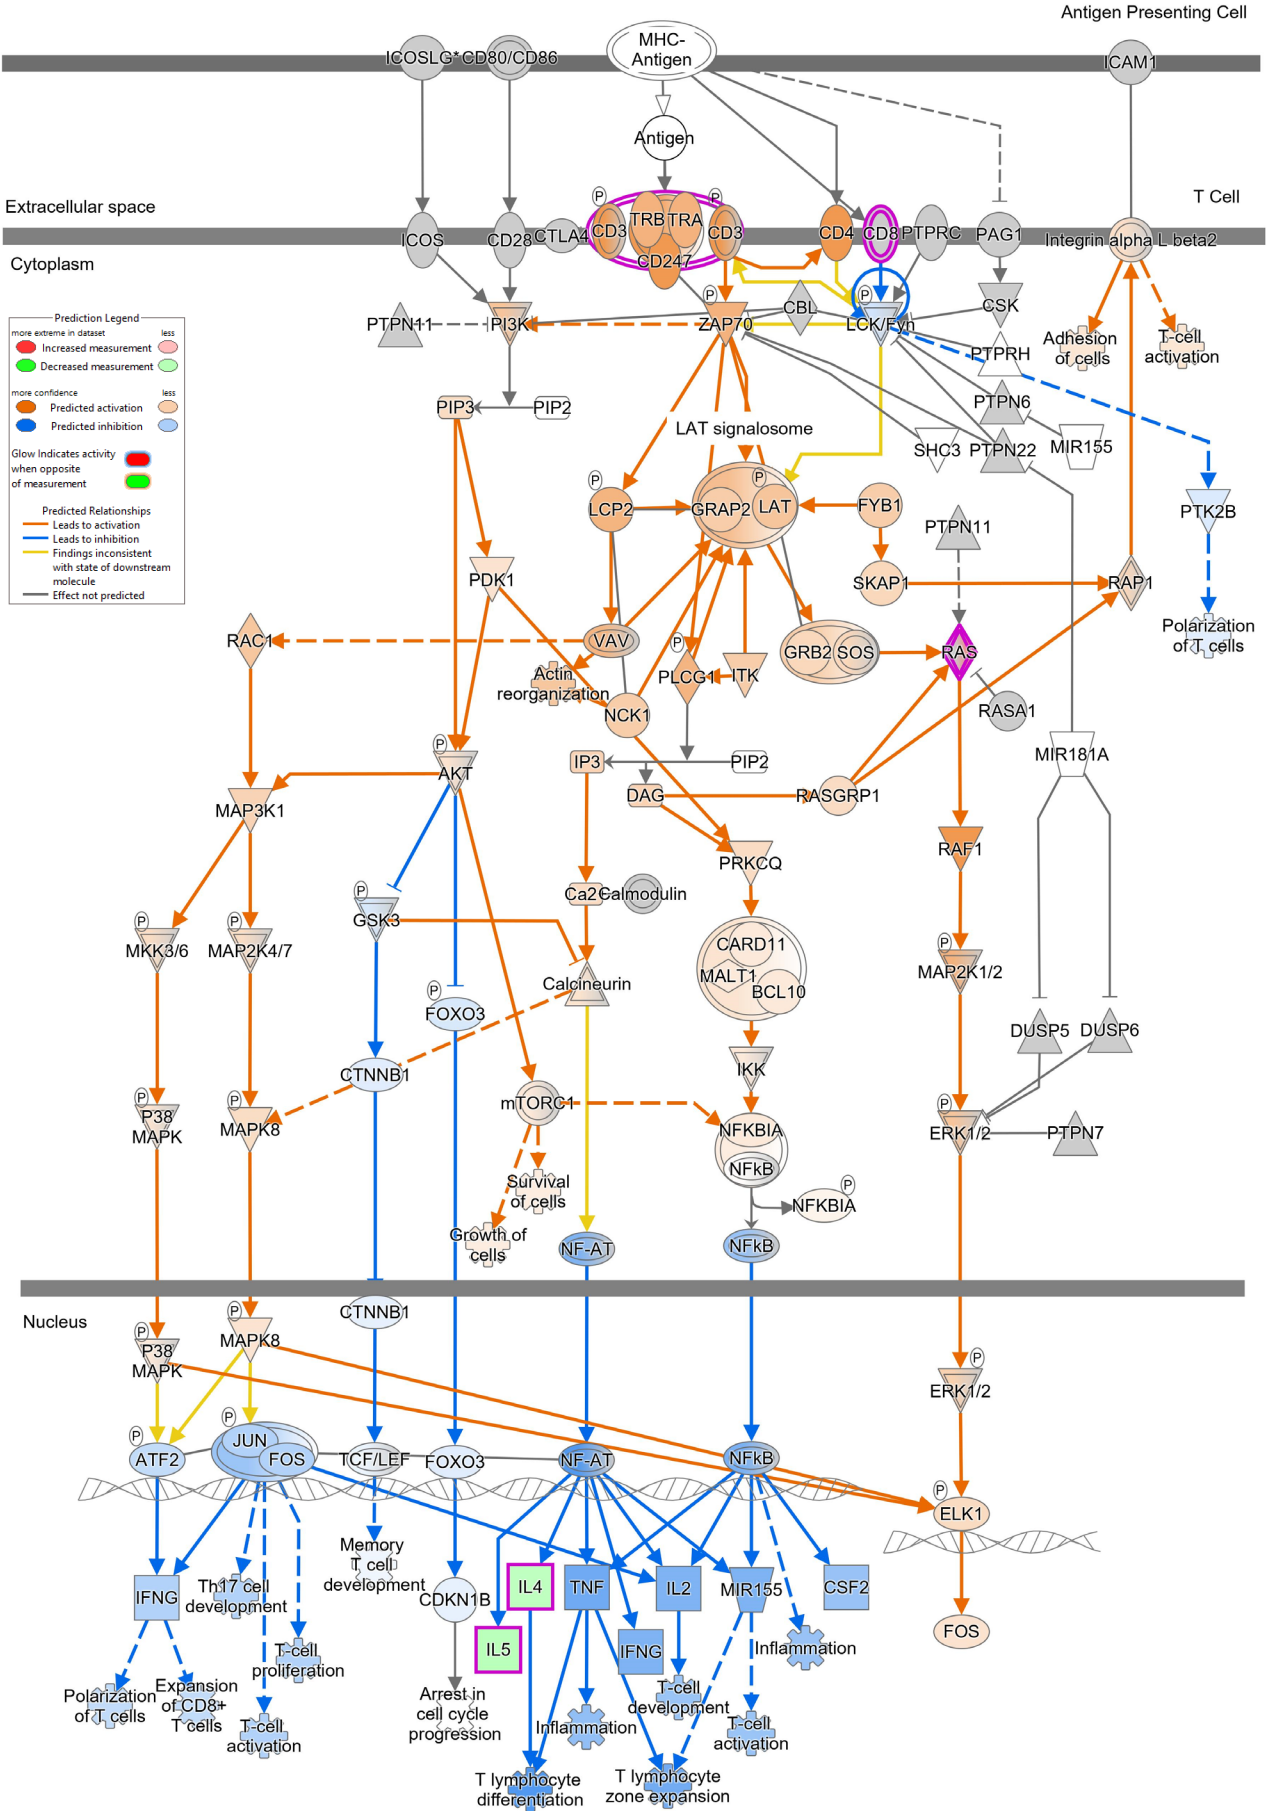

G Protein Signaling Mediated by Tubby

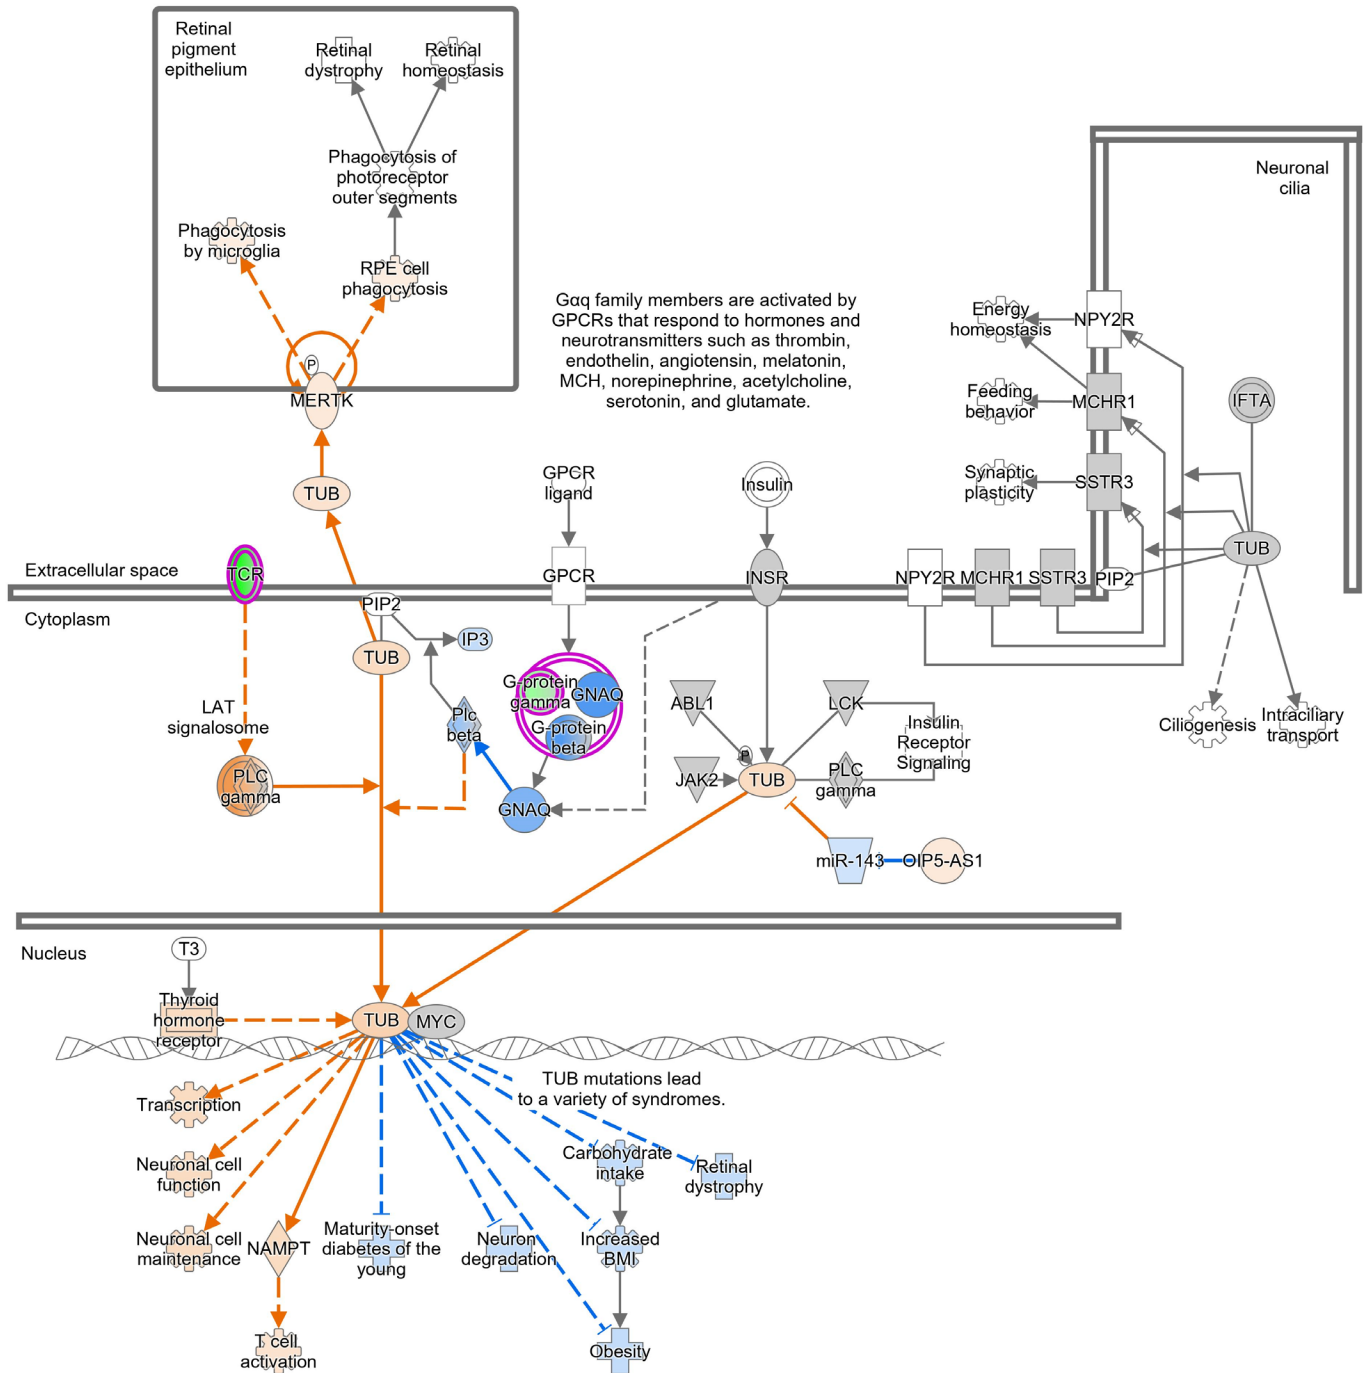

Supplement: NIHMS1914778-supplement-1.pdf [file NIHMS1914778-supplement-1.pdf]
